# Supplementary material
Source: publisher site journal article supplement (https://oneecosystem.pensoft.net/article/download/suppl/7674644/)
Supplement: Supplementary file 1

| Ecosystem type according to the Ecosystem type map of Hungary           | Ecosystem type code | Á-NÉR code | Á-NÉR name                                                         |
|-------------------------------------------------------------------------|---------------------|------------|--------------------------------------------------------------------|
| Open sand steppes                                                       | 3110                | G1         | Open sand steppes                                                  |
| Closed sand steppes                                                     | 3120                | H5b        | Closed sand steppes                                                |
| Salt steppes and meadows (grasslands affected by salinisation included) | 3200                | F1a        | Artemisia salt steppes                                             |
|                                                                         |                     | F1b        | Achillea steppes on meadow solonetz soils                          |
|                                                                         |                     | F2         | Salt meadows                                                       |
|                                                                         |                     | F3         | Tall herb salt meadows and salt meadow steppes                     |
|                                                                         |                     | F4         | Dense and tall Puccinellia swards                                  |
|                                                                         |                     | F5         | Annual salt pioneer swards of steppes and lakes                    |
| Calcareous open rocky grasslands                                        | 3310                | G2         | Calcareous open rocky grasslands                                   |
|                                                                         |                     | H2         | Calcareous rocky steppes                                           |
| Siliceous open rocky grasslands                                         | 3320                | G3         | Siliceous open rocky grasslands; Slope steppes on stony ground     |
|                                                                         |                     | H3a        | Slope steppes on stony soils                                       |
| Closed grasslands in hills and mountains or on cohesive soil            | 3400                | E1         | Arrhenatherum hay meadows;                                         |
|                                                                         |                     | E2         | Festuca rubra hay meadows;                                         |
|                                                                         |                     | E34        | Nardus swards and other acidofrequent grasslands on shallow soils  |
|                                                                         |                     | H1         | Closed rocky grasslands                                            |
|                                                                         |                     | H4         | Semi-dry grasslands, forest-steppe meadows                         |
|                                                                         |                     | H5a        | Closed steppes on loess                                            |
|                                                                         |                     | OC         | Uncharacteristic dry/semi-dry grasslands and tall herb communities |
| Other herbaceous vegetation                                             | 3500                | E5         | Dry Calluna heaths                                                 |
|                                                                         |                     | I1         | Natural pioneer vegetation of wet substrates                       |
|                                                                         |                     | I2         | Semi-desert vegetation on loess cliffs                             |
|                                                                         |                     | I3a        | Pioneer vegetation of rock walls                                   |
|                                                                         |                     | I4         | Open vegetation of shaded cliffs and screes                        |
|                                                                         |                     | OD         | Stands of invasive forbs                                           |
|                                                                         |                     | OF         | Ruderal tall-herb vegetation                                       |
|                                                                         |                     | OG         | Trampled and ruderal vegetation                                    |
| Tall-herb vegetation of marshes and fens standing in water              | 5110                | B1a        | Eu- and mesotrophic reed and Typha beds                            |
|                                                                         |                     | B1b        | Floating fens, oligotrophic reed and Typha beds of fens            |
|                                                                         |                     | B2         | Glyceria, Sparganium and Schoenoplectus beds                       |

| Ecosystem type according to the Ecosystem type map of Hungary           | Ecosystem type code | Á-NÉR code | Á-NÉR name                                                                     |
|-------------------------------------------------------------------------|---------------------|------------|--------------------------------------------------------------------------------|
| Tall-herb vegetation of marshes and fens standing in water              | 5110                | B3         | Water-fringing helophyte beds with Butomus, Eleocharis or Alisma               |
|                                                                         |                     | B4         | Tussock sedge communities                                                      |
|                                                                         |                     | B5         | Non-tussock tall-sedge beds                                                    |
|                                                                         |                     | B6         | Salt marshes                                                                   |
|                                                                         |                     | BA         | Fine scale mosaic or zonation of marsh communities                             |
|                                                                         |                     | D5         | Tall-herb vegetation of stream banks and fens                                  |
|                                                                         |                     | D6         | Tall-herb vegetation of floodplains, marshes and mesic shadowed forest fringes |
| Fens and mesotrophic wet meadows, grasslands with periodic water effect | 5120                | OA         | Uncharacteristic wetlands                                                      |
|                                                                         |                     | D1         | Rich fens                                                                      |
|                                                                         |                     | D2         | Molinia meadows                                                                |
|                                                                         |                     | D34        | Mesotrophic wet meadows                                                        |
|                                                                         |                     | OB         | Uncharacteristic mesic grasslands                                              |
